# Supplementary material for: Twelve years of circulatory extracorporeal life support at the University Medical Centre Utrecht
Source: Springer Nature journal article supplement (doi:10.1007/s12471-021-01552-z), 2021-03-06

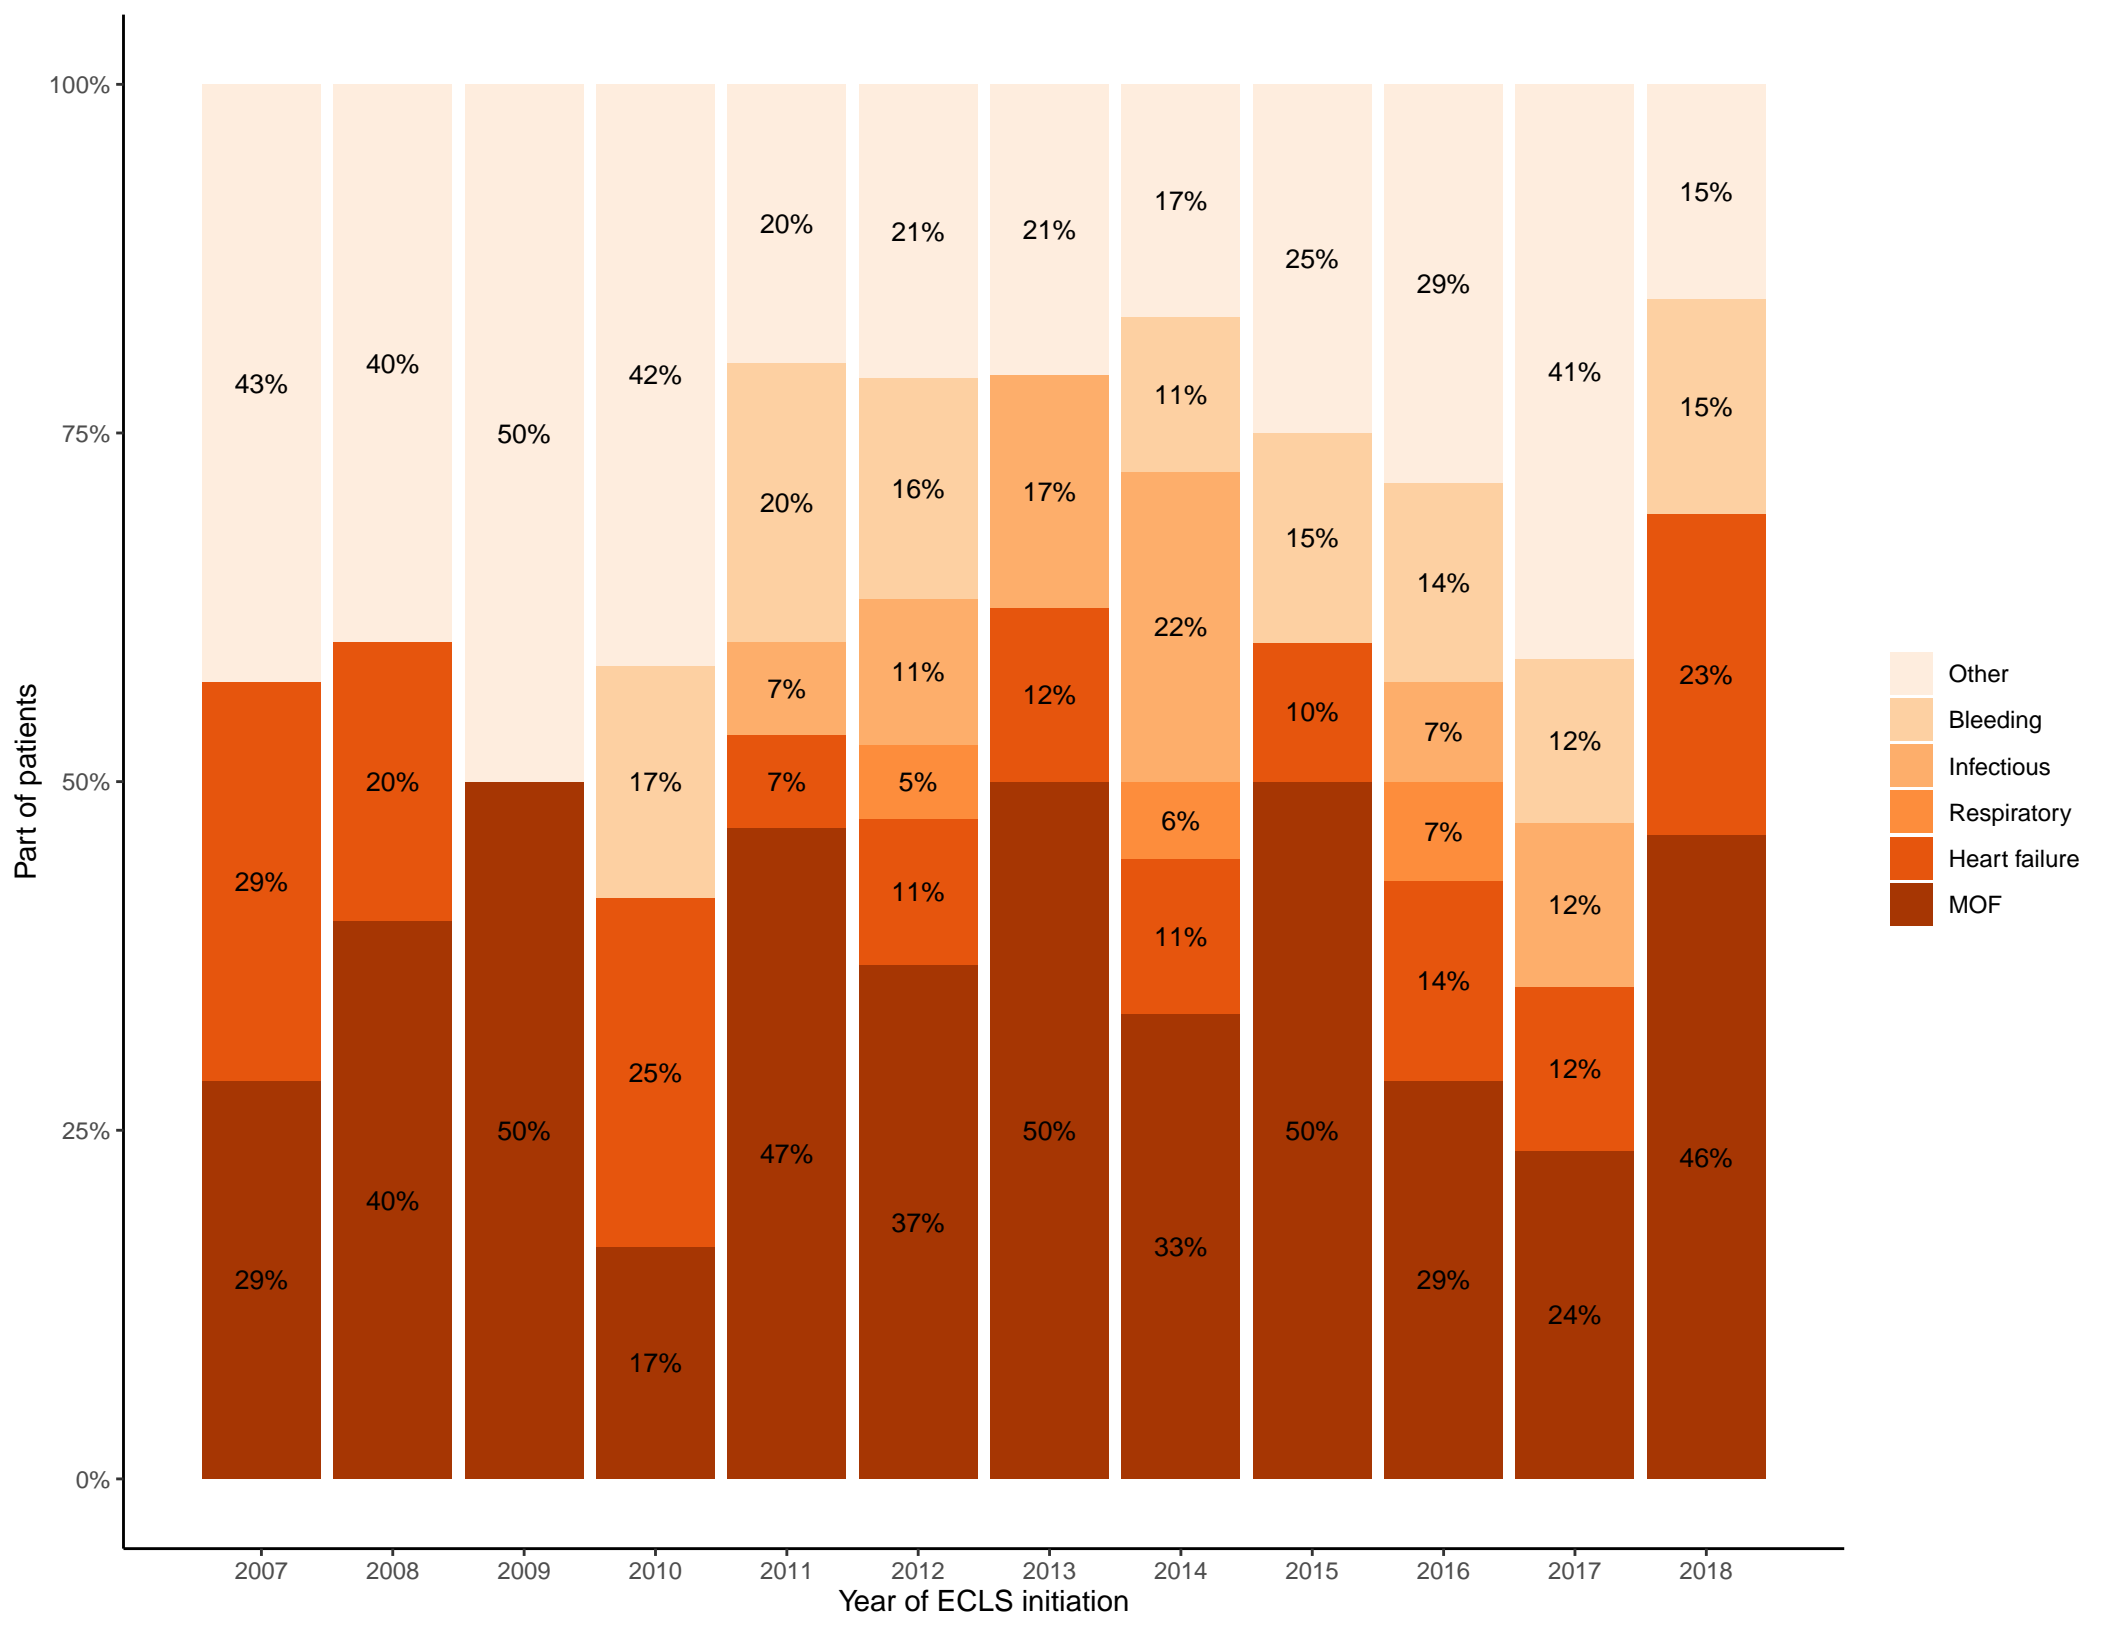

Supplement: MOESM1 [file 18937136]
